# Supplementary material for: Multi-Element Analysis and Origin Discrimination of Panax notoginseng Based on Inductively Coupled Plasma Tandem Mass Spectrometry (ICP-MS/MS)
Source: MDPI journal article supplement (doi:10.3390/molecules27092982), 2022-05-06
Supplement: s1 [file s1]

Supplementary Materials

# Multi-Element Analysis and Origin Discrimination of *Panax notoginseng* Based on Inductively Coupled Plasma Tandem Mass Spectrometry (ICP-MS/MS)

Chao Ji <sup>1,†</sup>, Jinyu Liu <sup>1,†</sup>, Qin Zhang <sup>2</sup>, Juan Li <sup>2</sup>, Zhiqiang Wu <sup>2</sup>, Xingyu Wang <sup>2</sup>, Yuxin Xie <sup>2</sup>, Jiangchao Zhao <sup>3</sup>, Rui Shi <sup>4</sup>, Xing Ma <sup>5</sup>, Mohammad Rizwan Khan <sup>6</sup>, Rosa Busquets <sup>7</sup>, Xiahong He <sup>1,4</sup>, Youyong Zhu <sup>1</sup>, Shusheng Zhu <sup>1,\*</sup> and Wenjie Zheng <sup>1,2,4,\*</sup>

<sup>1</sup> State Key Laboratory for Conservation and Utilization of Bio-Resources in Yunnan, National Engineering Research Center for Applied Technology of Agricultural Biodiversity, College of Plant Protection, Yunnan Agricultural University, Kunming 650201, China; jichao1100@163.com (C.J.); dianchahuyihao@163.com (J.L.); hexiahong@hotmail.com (X.H.); yyzhu@ynau.edu.cn (Y.Z.)

<sup>2</sup> Laboratory for Quality Control and Traceability of Food and Agricultural Products, Tianjin Normal University, Tianjin 300387, China; 17854265918@163.com (Q.Z.); lijuandk0916@163.com (J.L.); wuzhiqiang314@126.com (Z.W.); wangxingyu100198@163.com (X.W.); wugeheshimo@163.com (Y.X.)

<sup>3</sup> Department of Animal Science, Division of Agriculture, University of Arkansas, Fayetteville, AR 72701, USA; jzhao77@uark.edu

<sup>4</sup> Key Laboratory for Forest Resources Conservation and Utilization in the Southwest Mountains of China, Ministry of Education, Southwest Landscape Architecture Engineering Research Center of National Forestry and Grassland Administration, Southwest Forestry University, Kunming 650224, China; shirui@swfu.edu.cn

<sup>5</sup> The Animal, Plant & Foodstuff Inspection Center, Tianjin Customs, Tianjin 300387, China; xingma2005@126.com

<sup>6</sup> Department of Chemistry, College of Science, King Saud University, Riyadh 11451, Saudi Arabia; mrkhan@ksu.edu.sa

<sup>7</sup> School of Life Sciences, Pharmacy and Chemistry, Kingston University London, Penrhyn Road, KT1 2EE, Kingston Upon Thames, UK; r.busquets@kingston.ac.uk

\* Correspondence: shushengzhu79@126.com (S.Z.); skyzwj@tjnu.edu.cn (W.Z.)

† These authors contributed equally to this work.

**Table S1.** Linear ranges, equations, correlation coefficients ( $R^2$ ), LODs, and LOQs of the ICP-MS/MS for the determination of multi-elements in *P. notoginseng*.

| Element           | Linear Range (ng/mL) | Equation               | $R^2$  | LODs (mg/kg) | LOQs (mg/kg) |
|-------------------|----------------------|------------------------|--------|--------------|--------------|
| <sup>23</sup> Na  | 6.62-4000            | $y = 155.08x + 15060$  | 0.9994 | 0.2484       | 0.8280       |
| <sup>24</sup> Mg  | 7.93-4000            | $y = 59.433x + 375.77$ | 0.9995 | 0.2975       | 0.9916       |
| <sup>27</sup> Al  | 5.22-400             | $y = 13.565x + 79.102$ | 0.9992 | 0.1956       | 0.6520       |
| <sup>39</sup> K   | 32.00-4000           | $y = 19.893x + 4234.7$ | 0.9996 | 1.2000       | 4.0001       |
| <sup>43</sup> Ca  | 110.89-4000          | $y = 0.2365x + 50.829$ | 0.9926 | 4.1585       | 13.8618      |
| <sup>44</sup> Ca  | 205.76-4000          | $y = 2.2262x + 284.74$ | 0.9989 | 7.7160       | 25.7202      |
| <sup>51</sup> V   | 0.09-40              | $y = 578.88x + 23.959$ | 0.9996 | 0.0035       | 0.0115       |
| <sup>52</sup> Cr  | 0.24-40              | $y = 785.24x + 386.76$ | 0.9993 | 0.0088       | 0.0295       |
| <sup>53</sup> Cr  | 0.20-40              | $y = 98.633x + 61.657$ | 0.9987 | 0.0073       | 0.0244       |
| <sup>55</sup> Mn  | 0.16-40              | $y = 252.05x + 169.71$ | 0.9994 | 0.0058       | 0.0195       |
| <sup>56</sup> Fe  | 5.49-4000            | $y = 699.73x - 46446$  | 0.9989 | 0.2059       | 0.6863       |
| <sup>57</sup> Fe  | 8.56-4000            | $y = 14.033x + 18.482$ | 0.9995 | 0.3212       | 1.0706       |
| <sup>59</sup> Co  | 0.15-40              | $y = 1422.6x + 313.2$  | 0.9993 | 0.0056       | 0.0185       |
| <sup>60</sup> Ni  | 0.35-40              | $y = 402.28x + 367.71$ | 0.9994 | 0.0131       | 0.0438       |
| <sup>63</sup> Cu  | 1.25-40              | $y = 1061.6x + 1238.9$ | 0.9992 | 0.0468       | 0.1559       |
| <sup>65</sup> Cu  | 0.94-40              | $y = 531.46x + 648.87$ | 0.9993 | 0.0354       | 0.1181       |
| <sup>66</sup> Zn  | 2.54-400             | $y = 126.07x + 400.91$ | 0.9994 | 0.0954       | 0.3179       |
| <sup>75</sup> As  | 0.08-40              | $y = 77.049x + 23.903$ | 0.9987 | 0.0031       | 0.0104       |
| <sup>78</sup> Se  | 0.22-40              | $y = 7.9761x - 1.3532$ | 0.9987 | 0.0083       | 0.0275       |
| <sup>88</sup> Sr  | 0.97-400             | $y = 180.8x + 634.56$  | 0.9992 | 0.0362       | 0.1208       |
| <sup>89</sup> Y   | 0.02-40              | $y = 30488x - 40468$   | 0.9919 | 0.0006       | 0.0022       |
| <sup>97</sup> Mo  | 0.07-40              | $y = 323.98x + 61.331$ | 0.9995 | 0.0026       | 0.0088       |
| <sup>98</sup> Mo  | 0.05-40              | $y = 867.47x + 31.601$ | 0.9997 | 0.0018       | 0.0059       |
| <sup>107</sup> Ag | 0.08-40              | $y = 935.77x + 35.634$ | 0.9995 | 0.0031       | 0.0103       |
| <sup>111</sup> Cd | 0.09-40              | $y = 171.63x + 2.9439$ | 0.9997 | 0.0033       | 0.0109       |
| <sup>114</sup> Cd | 0.10-40              | $y = 438.28x + 65.226$ | 0.9995 | 0.0037       | 0.0122       |
| <sup>118</sup> Sn | 0.64-400             | $y = 25.977x + 29.411$ | 0.9996 | 0.0241       | 0.0802       |
| <sup>123</sup> Sb | 0.08-40              | $y = 284.63x + 20.599$ | 0.9991 | 0.0030       | 0.0102       |
| <sup>137</sup> Ba | 0.71-40              | $y = 97.506x + 55.9$   | 0.9987 | 0.0267       | 0.0890       |
| <sup>139</sup> La | 0.07-12.5            | $y = 34256x - 6346.8$  | 0.9993 | 0.0028       | 0.0093       |
| <sup>140</sup> Ce | 0.09-12.5            | $y = 31855x - 4472.6$  | 0.999  | 0.0033       | 0.0111       |
| <sup>141</sup> Pr | 0.04-12.5            | $y = 35858x - 4611.6$  | 0.9991 | 0.0014       | 0.0045       |
| <sup>146</sup> Nd | 0.06-40              | $y = 3677.4x - 136.72$ | 0.9995 | 0.0024       | 0.0079       |
| <sup>147</sup> Sm | 0.05-40              | $y = 3048.4x - 324.62$ | 0.9997 | 0.0019       | 0.0062       |
| <sup>153</sup> Eu | 0.01-40              | $y = 10360x - 1141.9$  | 0.9995 | 0.0005       | 0.0016       |
| <sup>157</sup> Gd | 0.03-40              | $y = 3300.1x + 119.2$  | 0.9992 | 0.0010       | 0.0034       |

| Element           | Linear<br>Range<br>(ng/mL) | Equation             | R <sup>2</sup> | LODs<br>(mg/kg) | LOQs<br>(mg/kg) |
|-------------------|----------------------------|----------------------|----------------|-----------------|-----------------|
| <sup>163</sup> Dy | 0.01-40                    | y = 4476.5x - 458.3  | 0.9996         | 0.0005          | 0.0016          |
| <sup>165</sup> Ho | 0.03-12.5                  | y = 28814x - 5256.3  | 0.9995         | 0.0011          | 0.0037          |
| <sup>166</sup> Er | 0.01-40                    | y = 5846.5x - 597.19 | 0.9996         | 0.0005          | 0.0015          |
| <sup>169</sup> Tm | 0.03-12.5                  | y = 28662x - 5784.1  | 0.9994         | 0.0012          | 0.0038          |
| <sup>172</sup> Yb | 0.01-40                    | y = 3743.8x - 668.1  | 0.9996         | 0.0004          | 0.0013          |
| <sup>200</sup> Hg | 0.01-8                     | y = 2359.2x + 38.878 | 0.9995         | 0.0003          | 0.0011          |
| <sup>202</sup> Hg | 0.01-8                     | y = 3119.2x + 10.011 | 0.9995         | 0.0004          | 0.0012          |
| <sup>205</sup> Tl | 0.02-40                    | y = 3232.2x + 820.02 | 0.9991         | 0.0008          | 0.0027          |
| <sup>206</sup> Pb | 0.12-40                    | y = 1052.3x + 274.81 | 0.9992         | 0.0043          | 0.0144          |
| <sup>207</sup> Pb | 0.09-40                    | y = 922.91x + 192.78 | 0.9993         | 0.0032          | 0.0108          |
| <sup>208</sup> Pb | 0.11-40                    | y = 4246.2x + 1077.5 | 0.9992         | 0.0043          | 0.0143          |
| <sup>232</sup> Th | 0.03-40                    | y = 7967.5x + 50.934 | 0.9994         | 0.0010          | 0.0034          |
| <sup>238</sup> U  | 0.02-40                    | y = 4664.6x + 1836.9 | 0.9989         | 0.0009          | 0.0028          |

**Table S2.** The spike recovery and reproducibility of *P. notoginseng* (n= 3).

| Element          | Background (mg/kg) | Added (mg/kg) | Recovery (%) | RSD (%) |
|------------------|--------------------|---------------|--------------|---------|
| <sup>23</sup> Na | 31.21              | 200           | 99.56        | 1.87    |
|                  |                    | 20            | 100.62       | 4.29    |
| <sup>24</sup> Mg | 2453.25            | 2000          | 96.12        | 7.60    |
|                  |                    | 200           | 95.04        | 9.35    |
| <sup>27</sup> Al | 232.26             | 200           | 87.04        | 5.93    |
|                  |                    | 20            | 93.70        | 6.66    |
| <sup>39</sup> K  | 28495.69           | 2000          | 94.77        | 3.63    |
|                  |                    | 200           | 95.05        | 9.14    |
| <sup>43</sup> Ca | 1064.43            | 2000          | 97.00        | 3.54    |
|                  |                    | 200           | 91.95        | 5.54    |
| <sup>44</sup> Ca | 1491.75            | 2000          | 98.60        | 3.56    |
|                  |                    | 200           | 86.79        | 3.20    |
| <sup>51</sup> V  | 0.40               | 20            | 99.45        | 4.27    |
|                  |                    | 5             | 92.97        | 7.08    |
| <sup>52</sup> Cr | 0.54               | 20            | 97.16        | 4.66    |
|                  |                    | 5             | 97.09        | 5.67    |
| <sup>53</sup> Cr | 0.60               | 20            | 99.20        | 6.55    |
|                  |                    | 5             | 96.72        | 5.01    |
| <sup>55</sup> Mn | 67.92              | 20            | 90.54        | 4.35    |
|                  |                    | 5             | 99.45        | 9.31    |
| <sup>56</sup> Fe | 51.17              | 20            | 96.99        | 3.46    |
|                  |                    | 5             | 92.93        | 3.97    |
| <sup>57</sup> Fe | 70.49              | 20            | 94.41        | 9.40    |
|                  |                    | 5             | 86.75        | 4.01    |
| <sup>59</sup> Co | 0.12               | 2             | 96.02        | 4.44    |
|                  |                    | 0.5           | 96.73        | 7.88    |
| <sup>60</sup> Ni | 2.64               | 2             | 95.88        | 7.56    |
|                  |                    | 0.5           | 96.20        | 9.63    |
| <sup>63</sup> Cu | 5.23               | 20            | 94.57        | 2.48    |
|                  |                    | 5             | 101.62       | 4.41    |
| <sup>65</sup> Cu | 5.27               | 20            | 99.13        | 3.58    |
|                  |                    | 5             | 93.20        | 8.66    |
| <sup>66</sup> Zn | 14.50              | 20            | 95.83        | 7.37    |
|                  |                    | 5             | 88.66        | 3.83    |
| <sup>75</sup> As | 0.14               | 2             | 95.71        | 4.06    |
|                  |                    | 0.5           | 93.51        | 1.67    |
| <sup>78</sup> Se | 0.12               | 2             | 93.35        | 2.09    |
|                  |                    | 0.5           | 96.05        | 6.83    |

| Element           | Background (mg/kg) | Added<br>(mg/kg) | Recovery<br>(%) | RSD (%) |
|-------------------|--------------------|------------------|-----------------|---------|
| <sup>88</sup> Sr  | 5.53               | 20               | 95.66           | 5.92    |
|                   |                    | 5                | 97.31           | 4.99    |
| <sup>89</sup> Y   | 0.71               | 2                | 95.31           | 7.95    |
|                   |                    | 0.5              | 91.90           | 5.01    |
| <sup>97</sup> Mo  | 0.02               | 2                | 97.38           | 8.02    |
|                   |                    | 0.5              | 96.19           | 1.56    |
| <sup>98</sup> Mo  | 0.02               | 2                | 100.75          | 3.11    |
|                   |                    | 0.5              | 104.98          | 2.42    |
| <sup>107</sup> Ag | 0.01               | 2                | 98.76           | 3.90    |
|                   |                    | 0.5              | 98.36           | 4.22    |
| <sup>111</sup> Cd | 0.54               | 2                | 94.47           | 8.35    |
|                   |                    | 0.5              | 94.55           | 5.05    |
| <sup>114</sup> Cd | 0.54               | 2                | 95.36           | 5.99    |
|                   |                    | 0.5              | 94.78           | 9.26    |
| <sup>118</sup> Sn | 0.05               | 2                | 100.91          | 2.77    |
|                   |                    | 0.5              | 89.62           | 5.79    |
| <sup>123</sup> Sb | 0.07               | 2                | 96.62           | 9.38    |
|                   |                    | 0.5              | 85.82           | 2.17    |
| <sup>137</sup> Ba | 17.64              | 2                | 95.12           | 8.59    |
|                   |                    | 0.5              | 93.74           | 9.70    |
| <sup>139</sup> La | 0.57               | 2                | 96.66           | 8.42    |
|                   |                    | 0.5              | 98.66           | 9.47    |
| <sup>140</sup> Ce | 0.34               | 2                | 95.61           | 7.05    |
|                   |                    | 0.5              | 97.79           | 5.30    |
| <sup>141</sup> Pr | 0.08               | 2                | 95.78           | 4.55    |
|                   |                    | 0.5              | 88.46           | 5.69    |
| <sup>146</sup> Nd | 0.57               | 2                | 91.72           | 5.63    |
|                   |                    | 0.5              | 98.87           | 9.63    |
| <sup>147</sup> Sm | 0.10               | 2                | 92.45           | 3.35    |
|                   |                    | 0.5              | 97.11           | 5.79    |
| <sup>153</sup> Eu | 0.03               | 2                | 97.71           | 3.71    |
|                   |                    | 0.5              | 96.86           | 3.76    |
| <sup>157</sup> Gd | 0.12               | 2                | 98.85           | 7.58    |
|                   |                    | 0.5              | 95.41           | 5.70    |
| <sup>163</sup> Dy | 0.09               | 2                | 93.64           | 2.09    |
|                   |                    | 0.5              | 95.21           | 8.29    |
| <sup>165</sup> Ho | 0.01               | 2                | 100.47          | 3.71    |
|                   |                    | 0.5              | 98.53           | 2.99    |
| <sup>166</sup> Er | 0.06               | 2                | 98.04           | 2.02    |

| Element           | Background (mg/kg) | Added<br>(mg/kg) | Recovery<br>(%) | RSD (%) |
|-------------------|--------------------|------------------|-----------------|---------|
|                   |                    | 0.5              | 91.51           | 8.31    |
| <sup>169</sup> Tm | 0.003              | 2                | 98.33           | 7.80    |
|                   |                    | 0.5              | 99.97           | 2.97    |
| <sup>172</sup> Yb | 0.04               | 2                | 97.24           | 4.62    |
|                   |                    | 0.5              | 88.31           | 6.40    |
| <sup>200</sup> Hg | 0.003              | 2                | 100.84          | 2.59    |
|                   |                    | 0.5              | 102.70          | 6.00    |
| <sup>202</sup> Hg | 0.003              | 2                | 100.86          | 2.61    |
|                   |                    | 0.5              | 102.75          | 5.95    |
| <sup>205</sup> Tl | 0.02               | 2                | 99.78           | 5.19    |
|                   |                    | 0.5              | 100.44          | 5.30    |
| <sup>206</sup> Pb | 0.53               | 2                | 95.17           | 8.20    |
|                   |                    | 0.5              | 97.34           | 4.76    |
| <sup>207</sup> Pb | 0.53               | 2                | 95.26           | 8.25    |
|                   |                    | 0.5              | 97.73           | 5.93    |
| <sup>208</sup> Pb | 0.53               | 2                | 95.00           | 8.47    |
|                   |                    | 0.5              | 96.65           | 6.14    |
| <sup>232</sup> Th | 0.01               | 2                | 100.73          | 2.69    |
|                   |                    | 0.5              | 98.93           | 2.43    |
| <sup>238</sup> U  | 0.005              | 2                | 96.42           | 6.05    |
|                   |                    | 0.5              | 95.02           | 5.63    |

**Table S3. Multi-element contents and comparison results using Duncan'test for *P.notoginseng* of different geographical origins (mg/kg).** Different uppercase and lowercase letters indicate significant differences between origins ( $P < 0.05$ ).

| Element<br>s     | HongHe (n=15)      | KunMing (n=15)         | PuEr (n=15)        | QuJing (n=36)          | WenShan (n=8)      | F-<br>value | P-<br>valu<br>e |
|------------------|--------------------|------------------------|--------------------|------------------------|--------------------|-------------|-----------------|
| <sup>23</sup> Na | 25.41 ± 2.88a      | 19.64 ± 2.47a          | 23.86 ± 4.66a      | 26.78 ± 3.77a          | 22.74 ± 2.69a      | 1.457       | 0.223           |
| <sup>24</sup> Mg | 1791.29 ± 134.49bc | 1513.98 ± 156.71c      | 2265.59 ± 181.24a  | 1501.54 ± 127.61c      | 1843.46 ± 149.06b  | 10.33       | 0.000           |
| <sup>27</sup> Al | 425.63 ± 58.51b    | 558.28 ± 94.08ab       | 323.5 ± 29.99b     | 669.35 ± 62.95a        | 377.73 ± 72.88b    | 4.424       | 0.003           |
| <sup>39</sup> K  | 24682.91 ± 757.19a | 18585.65 ±<br>1281.09c | 21590.17 ± 843.64b | 24082.02 ±<br>482.13ab | 24437.46 ± 876.67a | 9.318       | 0.000           |
| <sup>43</sup> Ca | 979.63 ± 66.21bc   | 955.17 ± 71.16c        | 1232.66 ± 61.6a    | 958.34 ± 24.57c        | 1124.39 ± 43.09ab  | 5.699       | 0.000           |
| <sup>44</sup> Ca | 1353.93 ± 89.79b   | 1333.55 ± 99.4b        | 1729.79 ± 86.82a   | 1304.64 ± 34b          | 1570.86 ± 67.3a    | 6.764       | 0.000           |
| <sup>51</sup> V  | 1.3 ± 0.27ab       | 1.25 ± 0.2ab           | 0.58 ± 0.07b       | 1.7 ± 0.18a            | 1.14 ± 0.27ab      | 4.17        | 0.004           |
| <sup>52</sup> Cr | 1.49 ± 0.28ab      | 1.38 ± 0.21ab          | 0.79 ± 0.1b        | 2.18 ± 0.34a           | 0.76 ± 0.2b        | 3.433       | 0.012           |
| <sup>53</sup> Cr | 1.38 ± 0.26ab      | 1.32 ± 0.2ab           | 0.75 ± 0.09b       | 2.09 ± 0.32a           | 0.77 ± 0.2b        | 3.405       | 0.013           |
| <sup>55</sup> Mn | 49.28 ± 3.97ab     | 57.57 ± 5.21a          | 40.27 ± 2.96b      | 41.75 ± 3.85b          | 40.52 ± 6.53b      | 2.313       | 0.064           |
| <sup>56</sup> Fe | 263.33 ± 67.07b    | 264.33 ± 47.88b        | 115.29 ± 15.16b    | 493.33 ± 69.36a        | 226.21 ± 76.52b    | 4.991       | 0.001           |
| <sup>57</sup> Fe | 262.74 ± 63.4ab    | 260.59 ± 43.33ab       | 135.85 ± 12.5b     | 477.91 ± 67.41a        | 223.87 ± 68.86b    | 4.57        | 0.002           |
| <sup>59</sup> Co | 0.33 ± 0.04ab      | 0.23 ± 0.03bc          | 0.11 ± 0.01c       | 0.47 ± 0.05a           | 0.26 ± 0.02bc      | 9.456       | 0.000           |
| <sup>60</sup> Ni | 1.73 ± 0.14b       | 2.53 ± 0.32a           | 2.01 ± 0.11ab      | 2 ± 0.11ab             | 1.93 ± 0.52ab      | 1.872       | 0.123           |
| <sup>63</sup> Cu | 3.48 ± 0.23b       | 3.39 ± 0.22b           | 4.55 ± 0.29a       | 3.87 ± 0.18ab          | 4.64 ± 0.47a       | 3.98        | 0.005           |
| <sup>65</sup> Cu | 3.43 ± 0.31b       | 3.39 ± 0.3b            | 4.56 ± 0.4a        | 3.78 ± 0.37b           | 4.68 ± 0.5a        | 4.434       | 0.003           |
| <sup>66</sup> Zn | 11.16 ± 0.8c       | 19.16 ± 3.28a          | 17.8 ± 2.18ab      | 14.32 ± 1.69bc         | 15.44 ± 1.5abc     | 4.673       | 0.002           |
| <sup>75</sup> As | 0.46 ± 0.18a       | 0.26 ± 0.06ab          | 0.18 ± 0.03b       | 0.33 ± 0.08ab          | 0.28 ± 0.07ab      | 2.154       | 0.081           |
| <sup>78</sup> Se | 0.03 ± 0.01ab      | 0.02 ± 0.01b           | 0.03 ± 0.01ab      | 0.05 ± 0.01a           | 0.04 ± 0.005ab     | 3.268       | 0.015           |

| Element<br>s      | HongHe (n=15)    | KunMing (n=15)  | PuEr (n=15)     | QuJing (n=36)   | WenShan (n=8)    | F-<br>value | P-<br>valu<br>e |
|-------------------|------------------|-----------------|-----------------|-----------------|------------------|-------------|-----------------|
| <sup>88</sup> Sr  | 7.86 ± 1.55a     | 5.99 ± 0.81a    | 8.24 ± 1.87a    | 6.56 ± 0.47a    | 6.26 ± 0.46a     | 1.571       | 0.190           |
| <sup>89</sup> Y   | 0.11 ± 0.01ab    | 0.09 ± 0.01b    | 0.12 ± 0.01ab   | 0.19 ± 0.02a    | 0.16 ± 0.04ab    | 3.806       | 0.007           |
| <sup>97</sup> Mo  | 0.09 ± 0.06ab    | 0.04 ± 0.01b    | 0.08 ± 0.01b    | 0.06 ± 0.01b    | 0.16 ± 0.08a     | 2.018       | 0.099           |
| <sup>98</sup> Mo  | 0.09 ± 0.06ab    | 0.04 ± 0.01b    | 0.07 ± 0.01b    | 0.06 ± 0.01b    | 0.16 ± 0.08a     | 1.955       | 0.109           |
| <sup>107</sup> Ag | 0.004 ± 0.001b   | 0.006 ± 0.001b  | 0.037 ± 0.016a  | 0.005 ± 0.001b  | 0.004 ± 0.001b   | 9.284       | 0.000           |
| <sup>111</sup> Cd | 0.26 ± 0.05b     | 0.81 ± 0.17a    | 0.35 ± 0.14b    | 0.46 ± 0.08b    | 0.34 ± 0.13b     | 6.705       | 0.000           |
| <sup>114</sup> Cd | 0.25 ± 0.05b     | 0.8 ± 0.17a     | 0.35 ± 0.14b    | 0.45 ± 0.08b    | 0.33 ± 0.13b     | 7.023       | 0.000           |
| <sup>118</sup> Sn | 0.07 ± 0.03ab    | 0.12 ± 0.03ab   | 0.07 ± 0.01ab   | 0.15 ± 0.06a    | 0.02 ± 0.01b     | 2.443       | 0.053           |
| <sup>123</sup> Sb | 0.18 ± 0.05a     | 0.08 ± 0.01b    | 0.07 ± 0.01b    | 0.09 ± 0.02b    | 0.11 ± 0.01b     | 6.586       | 0.000           |
| <sup>137</sup> Ba | 13.38 ± 0.97c    | 19.4 ± 4b       | 24.73 ± 2.84a   | 15.09 ± 0.98bc  | 16.34 ± 2.2bc    | 8.214       | 0.000           |
| <sup>139</sup> La | 0.17 ± 0.02b     | 0.2 ± 0.03ab    | 0.16 ± 0.02b    | 0.29 ± 0.08a    | 0.3 ± 0.06a      | 3.268       | 0.015           |
| <sup>140</sup> Ce | 0.29 ± 0.03bc    | 0.39 ± 0.05abc  | 0.19 ± 0.03c    | 0.59 ± 0.07a    | 0.52 ± 0.1ab     | 5.839       | 0.000           |
| <sup>141</sup> Pr | 0.03 ± 0.004b    | 0.03 ± 0.01b    | 0.03 ± 0.003b   | 0.06 ± 0.01a    | 0.05 ± 0.01ab    | 5.351       | 0.001           |
| <sup>146</sup> Nd | 0.19 ± 0.03b     | 0.21 ± 0.03b    | 0.16 ± 0.02b    | 0.35 ± 0.09a    | 0.27 ± 0.04ab    | 4.594       | 0.002           |
| <sup>147</sup> Sm | 0.04 ± 0.01b     | 0.04 ± 0.01b    | 0.03 ± 0.005b   | 0.07 ± 0.02a    | 0.05 ± 0.01ab    | 4.312       | 0.003           |
| <sup>153</sup> Eu | 0.01 ± 0.002b    | 0.01 ± 0.001ab  | 0.01 ± 0.002ab  | 0.02 ± 0.003a   | 0.01 ± 0.001ab   | 3.473       | 0.011           |
| <sup>157</sup> Gd | 0.04 ± 0.01b     | 0.04 ± 0.01b    | 0.03 ± 0.004b   | 0.07 ± 0.02a    | 0.05 ± 0.01ab    | 4.357       | 0.003           |
| <sup>163</sup> Dy | 0.03 ± 0.01ab    | 0.02 ± 0.003b   | 0.02 ± 0.003b   | 0.04 ± 0.01a    | 0.03 ± 0.005ab   | 3.639       | 0.009           |
| <sup>165</sup> Ho | 0.003 ± 0.001b   | 0.002 ± 0.0003b | 0.002 ± 0.0002b | 0.005 ± 0.001a  | 0.004 ± 0.001ab  | 4.7         | 0.002           |
| <sup>166</sup> Er | 0.01 ± 0.003ab   | 0.01 ± 0.002b   | 0.01 ± 0.001b   | 0.02 ± 0.01a    | 0.02 ± 0.002ab   | 3.915       | 0.006           |
| <sup>169</sup> Tm | 0.001 ± 0.0002ab | 0.001 ± 0.0001b | 0.001 ± 0.0001b | 0.002 ± 0.0007a | 0.001 ± 0.0002ab | 4.011       | 0.005           |
| <sup>172</sup> Yb | 0.01 ± 0.002ab   | 0.01 ± 0.001b   | 0.01 ± 0.001b   | 0.02 ± 0.003a   | 0.01 ± 0.002ab   | 4.364       | 0.003           |

| Element<br>s      | HongHe (n=15)  | KunMing (n=15)   | PuEr (n=15)     | QuJing (n=36)   | WenShan (n=8)   | F-<br>value | P-<br>valu<br>e |
|-------------------|----------------|------------------|-----------------|-----------------|-----------------|-------------|-----------------|
| <sup>200</sup> Hg | 0.003 ± 0.001a | 0.003 ± 0.0002a  | 0.003 ± 0.0002a | 0.004 ± 0.0004a | 0.003 ± 0.0002a | 1.44        | 0.228           |
| <sup>202</sup> Hg | 0.003 ± 0.001a | 0.003 ± 0.0002a  | 0.003 ± 0.0002a | 0.004 ± 0.0004a | 0.003 ± 0.0002a | 2.047       | 0.095           |
| <sup>205</sup> Tl | 0.02 ± 0.0032a | 0.03 ± 0.01a     | 0.02 ± 0.001a   | 0.04 ± 0.02a    | 0.03 ± 0.01a    | 0.709       | 0.588           |
| <sup>206</sup> Pb | 0.735 ± 0.16a  | 0.528 ± 0.06abc  | 0.277 ± 0.03c   | 0.612 ± 0.09ab  | 0.325 ± 0.06bc  | 3.111       | 0.020           |
| <sup>207</sup> Pb | 0.711 ± 0.16a  | 0.526 ± 0.06abc  | 0.282 ± 0.03c   | 0.612 ± 0.09ab  | 0.305 ± 0.06bc  | 3.058       | 0.021           |
| <sup>208</sup> Pb | 0.72 ± 0.16a   | 0.52 ± 0.09abc   | 0.28 ± 0.04c    | 0.61 ± 0.12ab   | 0.31 ± 0.08bc   | 3.054       | 0.022           |
| <sup>232</sup> Th | 0.003 ± 0.001a | 0.01 ± 0.003a    | 0.01 ± 0.002a   | 0.01 ± 0.01a    | 0.003 ± 0.001a  | 1.496       | 0.211           |
| <sup>238</sup> U  | 0.023 ± 0.007a | 0.019 ± 0.0043ab | 0.007 ± 0.0011b | 0.023 ± 0.007a  | 0.016 ± 0.003ab | 2.943       | 0.025           |

**Table S4. Multi-element contents and comparison results using T'test for *P.notoginseng* of different cultivation models (mg/kg).** T'test was used to determine significance, \*\*\*\* (P < 0.0001), \*\*\* (P < 0.001), \*\* (P < 0.01), \* (P < 0.05), and ns (P > 0.05).

| Elements          | Field(n=65)          | Forest(n=24)      |
|-------------------|----------------------|-------------------|
| <sup>23</sup> Na  | 24.34 ± 0.95ns       | 24.91 ± 3.08      |
| <sup>24</sup> Mg  | 1563.74 ± 46.42****  | 2113.44 ± 112.7   |
| <sup>27</sup> Al  | 613.99 ± 42.6****    | 284.17 ± 23.21    |
| <sup>39</sup> K   | 24035.51 ± 352.59*** | 19709.39 ± 977.07 |
| <sup>43</sup> Ca  | 958.42 ± 22.56***    | 1196.26 ± 52.58   |
| <sup>44</sup> Ca  | 1320.97 ± 31.54***   | 1663.73 ± 75.39   |
| <sup>51</sup> V   | 1.59 ± 0.12****      | 0.56 ± 0.05       |
| <sup>52</sup> Cr  | 1.88 ± 0.21****      | 0.72 ± 0.07       |
| <sup>53</sup> Cr  | 1.8 ± 0.2****        | 0.68 ± 0.07       |
| <sup>55</sup> Mn  | 47.68 ± 2.61*        | 38.94 ± 3.25      |
| <sup>56</sup> Fe  | 410.92 ± 43.92****   | 104.32 ± 10.6     |
| <sup>57</sup> Fe  | 398.15 ± 42.44****   | 125.16 ± 8.9      |
| <sup>59</sup> Co  | 0.41 ± 0.03****      | 0.12 ± 0.01       |
| <sup>60</sup> Ni  | 1.95 ± 0.1ns         | 2.28 ± 0.21       |
| <sup>63</sup> Cu  | 3.79 ± 0.13ns        | 4.23 ± 0.25       |
| <sup>65</sup> Cu  | 3.73 ± 0.13ns        | 4.24 ± 0.25       |
| <sup>66</sup> Zn  | 13.39 ± 0.52***      | 20.42 ± 1.58      |
| <sup>75</sup> As  | 0.37 ± 0.04****      | 0.15 ± 0.02       |
| <sup>78</sup> Se  | 0.04 ± 0.004*        | 0.03 ± 0.003      |
| <sup>88</sup> Sr  | 6.68 ± 0.31ns        | 7.65 ± 0.91       |
| <sup>89</sup> Y   | 0.16 ± 0.02**        | 0.1 ± 0.01        |
| <sup>97</sup> Mo  | 0.08 ± 0.01ns        | 0.06 ± 0.01       |
| <sup>98</sup> Mo  | 0.08 ± 0.01ns        | 0.06 ± 0.01       |
| <sup>107</sup> Ag | 0.005 ± 0.0003*      | 0.02 ± 0.01       |
| <sup>111</sup> Cd | 0.38 ± 0.03****      | 0.16 ± 0.01       |
| <sup>114</sup> Cd | 0.38 ± 0.03****      | 0.16 ± 0.01       |
| <sup>118</sup> Sn | 0.13 ± 0.02ns        | 0.1 ± 0.02        |
| <sup>123</sup> Sb | 0.11 ± 0.01***       | 0.07 ± 0.003      |
| <sup>137</sup> Ba | 14.48 ± 0.47****     | 24.8 ± 1.83       |
| <sup>139</sup> La | 0.26 ± 0.02****      | 0.15 ± 0.01       |
| <sup>140</sup> Ce | 0.52 ± 0.04****      | 0.21 ± 0.03       |
| <sup>141</sup> Pr | 0.05 ± 0.004****     | 0.02 ± 0.002      |
| <sup>146</sup> Nd | 0.3 ± 0.03****       | 0.15 ± 0.01       |
| <sup>147</sup> Sm | 0.06 ± 0.005****     | 0.03 ± 0.003      |
| <sup>153</sup> Eu | 0.02 ± 0.001ns       | 0.01 ± 0.001      |
| <sup>157</sup> Gd | 0.06 ± 0.005****     | 0.03 ± 0.002      |
| <sup>163</sup> Dy | 0.04 ± 0.003****     | 0.02 ± 0.001      |

| Elements          | Field(n=65)        | Forest(n=24)    |
|-------------------|--------------------|-----------------|
| <sup>165</sup> Ho | 0.004 ± 0.0004**** | 0.002 ± 0.0001  |
| <sup>166</sup> Er | 0.019 ± 0.0019**** | 0.01 ± 0.0008   |
| <sup>169</sup> Tm | 0.002 ± 0.0002**** | 0.001 ± 0.00005 |
| <sup>172</sup> Yb | 0.015 ± 0.0014**** | 0.007 ± 0.0007  |
| <sup>200</sup> Hg | 0.003 ± 0.0002ns   | 0.003 ± 0.0002  |
| <sup>202</sup> Hg | 0.003 ± 0.0002ns   | 0.003 ± 0.0002  |
| <sup>205</sup> Tl | 0.03 ± 0.01ns      | 0.03 ± 0.002    |
| <sup>206</sup> Pb | 0.61 ± 0.05****    | 0.34 ± 0.03     |
| <sup>207</sup> Pb | 0.61 ± 0.05****    | 0.34 ± 0.03     |
| <sup>208</sup> Pb | 0.61 ± 0.05****    | 0.34 ± 0.03     |
| <sup>232</sup> Th | 0.01 ± 0.002ns     | 0.01 ± 0.002    |
| <sup>238</sup> U  | 0.02 ± 0.002****   | 0.01 ± 0.001    |

**Table S5.** The allocation of sampling areas for the *P. notoginseng* in Yunnan province, China.

| Bases       | Time | Cultivation Model | Origins | Bases      | Time | Cultivation Model | Origins |
|-------------|------|-------------------|---------|------------|------|-------------------|---------|
| JianShui1-1 | 2019 | Field             | HongHe  | ShiLin1-1  | 2020 | Field             | KunMing |
| JianShui1-2 | 2019 | Field             | HongHe  | ShiLin1-2  | 2020 | Field             | KunMing |
| JianShui1-3 | 2019 | Field             | HongHe  | ShiLin1-3  | 2020 | Field             | KunMing |
| JianShui2-1 | 2019 | Field             | HongHe  | XuanWei1-1 | 2020 | Field             | QuJing  |
| JianShui2-2 | 2019 | Field             | HongHe  | XuanWei1-2 | 2020 | Field             | QuJing  |
| JianShui2-3 | 2019 | Field             | HongHe  | XuanWei1-3 | 2020 | Field             | QuJing  |
| ShiZong1-1  | 2019 | Field             | QuJing  | XuanWei2-1 | 2020 | Field             | QuJing  |
| ShiZong1-2  | 2019 | Field             | QuJing  | XuanWei2-2 | 2020 | Field             | QuJing  |
| ShiZong1-3  | 2019 | Field             | QuJing  | XuanWei2-3 | 2020 | Field             | QuJing  |
| ZhanYi1-1   | 2019 | Field             | QuJing  | ZhanYi1-1  | 2020 | Field             | QuJing  |
| ZhanYi1-2   | 2019 | Field             | QuJing  | ZhanYi1-2  | 2020 | Field             | QuJing  |
| ZhanYi1-3   | 2019 | Field             | QuJing  | ZhanYi1-3  | 2020 | Field             | QuJing  |
| ZhanYi2-1   | 2019 | Field             | QuJing  | LuLiang1-1 | 2020 | Field             | QuJing  |
| ZhanYi2-2   | 2019 | Field             | QuJing  | LuLiang1-2 | 2020 | Field             | QuJing  |
| ZhanYi2-3   | 2019 | Field             | QuJing  | LuLiang1-3 | 2020 | Field             | QuJing  |
| XuanWei1-1  | 2019 | Field             | QuJing  | MaLong1-1  | 2020 | Field             | QuJing  |
| XuanWei1-2  | 2019 | Field             | QuJing  | MaLong1-2  | 2020 | Field             | QuJing  |
| XuanWei1-3  | 2019 | Field             | QuJing  | MaLong1-3  | 2020 | Field             | QuJing  |
| XuanWei2-1  | 2019 | Field             | QuJing  | ShiZong1-1 | 2020 | Field             | QuJing  |
| XuanWei2-2  | 2019 | Field             | QuJing  | ShiZong1-2 | 2020 | Field             | QuJing  |
| XuanWei2-3  | 2019 | Field             | QuJing  | ShiZong1-3 | 2020 | Field             | QuJing  |
| QiuBei1-1   | 2019 | Field             | WenShan | QiuBei1-1  | 2020 | Field             | WenShan |

| Bases       | Time | Cultivation Model | Origins | Bases          | Time | Cultivation Model | Origins |
|-------------|------|-------------------|---------|----------------|------|-------------------|---------|
| QiuBei1-2   | 2019 | Field             | WenShan | QiuBei1-2      | 2020 | Field             | WenShan |
| QiuBei1-3   | 2019 | Field             | WenShan | QiuBei1-3      | 2020 | Field             | WenShan |
| DaTangZi1-1 | 2019 | Forest            | PuEr    | YanShan1-1     | 2020 | Field             | WenShan |
| DaTangZi1-2 | 2019 | Forest            | PuEr    | YanShan1-2     | 2020 | Field             | WenShan |
| DaTangZi1-3 | 2019 | Forest            | PuEr    | BaZi1-1        | 2020 | Forest            | PuEr    |
| DaTangZi2-1 | 2019 | Forest            | PuEr    | BaZi1-2        | 2020 | Forest            | PuEr    |
| DaTangZi2-2 | 2019 | Forest            | PuEr    | BaZi1-3        | 2020 | Forest            | PuEr    |
| DaTangZi2-3 | 2019 | Forest            | PuEr    | LaoMianZhai1-1 | 2020 | Forest            | PuEr    |
| JianShui1-1 | 2020 | Field             | HongHe  | LaoMianZhai1-2 | 2020 | Forest            | PuEr    |
| JianShui1-2 | 2020 | Field             | HongHe  | LaoMianZhai1-3 | 2020 | Forest            | PuEr    |
| JianShui1-3 | 2020 | Field             | HongHe  | LaoMianZhai2-1 | 2020 | Forest            | PuEr    |
| MengZi1-1   | 2020 | Field             | HongHe  | LaoMianZhai2-2 | 2020 | Forest            | PuEr    |
| MengZi1-2   | 2020 | Field             | HongHe  | LaoMianZhai2-3 | 2020 | Forest            | PuEr    |
| MengZi1-3   | 2020 | Field             | HongHe  | HuiZe1-1       | 2020 | Forest            | QuJing  |
| ShiPing1-1  | 2020 | Field             | HongHe  | HuiZe1-2       | 2020 | Forest            | QuJing  |
| ShiPing1-2  | 2020 | Field             | HongHe  | HuiZe1-3       | 2020 | Forest            | QuJing  |
| ShiPing1-3  | 2020 | Field             | HongHe  | XunDian1-1     | 2020 | Forest            | KunMing |
| XunDian3-1  | 2020 | Field             | KunMing | XunDian1-2     | 2020 | Forest            | KunMing |
| XunDian3-2  | 2020 | Field             | KunMing | XunDian1-3     | 2020 | Forest            | KunMing |
| XunDian3-3  | 2020 | Field             | KunMing | XunDian2-1     | 2020 | Forest            | KunMing |
| XunDian4-1  | 2020 | Field             | KunMing | XunDian2-2     | 2020 | Forest            | KunMing |
| XunDian4-2  | 2020 | Field             | KunMing | XunDian2-3     | 2020 | Forest            | KunMing |
| XunDian4-3  | 2020 | Field             | KunMing |                |      |                   |         |

**Table S6.** Agilent 8800 ICP-MS/MS operating parameters.

| Parameter                 | Operating condition                                                                                                                              |
|---------------------------|--------------------------------------------------------------------------------------------------------------------------------------------------|
| RF power                  | 1500 W                                                                                                                                           |
| Sampling depth            | 8.0 mm                                                                                                                                           |
| Number of replicates      | 3                                                                                                                                                |
| Stabilization time        | 10 s                                                                                                                                             |
| Auxiliary gas flow rate   | 0.40 L/min                                                                                                                                       |
| Makeup gas flow rate      | 0.20 L/min                                                                                                                                       |
| Carrier gas flow rate     | 1.05 L/min                                                                                                                                       |
| Spray chamber temperature | 2.0 °C                                                                                                                                           |
| Quadrupole bias V         | -16 V                                                                                                                                            |
| Octo pole bias V          | -18 V                                                                                                                                            |
| Internal standard         | <sup>45</sup> Sc, <sup>72</sup> Ge, <sup>74</sup> Ge, <sup>115</sup> In and <sup>209</sup> Bi                                                    |
|                           | <sup>23</sup> Na, <sup>24</sup> Mg, <sup>39</sup> K, <sup>43</sup> Ca, <sup>44</sup> Ca, <sup>51</sup> V, <sup>52</sup> Cr, <sup>53</sup> Cr,    |
|                           | <sup>55</sup> Mn, <sup>56</sup> Fe, <sup>57</sup> Fe, <sup>59</sup> Co, <sup>60</sup> Ni, <sup>63</sup> Cu, <sup>65</sup> Cu, <sup>66</sup> Zn,  |
|                           | <sup>75</sup> As, <sup>78</sup> Se, <sup>88</sup> Sr, <sup>89</sup> Y, <sup>97</sup> Mo, <sup>98</sup> Mo, <sup>107</sup> Ag, <sup>111</sup> Cd, |
| Isotopes                  | <sup>114</sup> Cd, <sup>118</sup> Sn, <sup>123</sup> Sb, <sup>137</sup> Ba, <sup>139</sup> La, <sup>140</sup> Ce, <sup>141</sup> Pr,             |
|                           | <sup>146</sup> Nd, <sup>147</sup> Sm, <sup>153</sup> Eu, <sup>157</sup> Gd, <sup>163</sup> Dy, <sup>165</sup> Ho, <sup>166</sup> Er,             |
|                           | <sup>169</sup> Tm, <sup>172</sup> Yb, <sup>200</sup> Hg, <sup>202</sup> Hg, <sup>205</sup> Tl, <sup>206</sup> Pb, <sup>207</sup> Pb,             |
|                           | <sup>208</sup> Pb, <sup>232</sup> Th and <sup>238</sup> U                                                                                        |
